# Supplementary material
Source: PubMed Central journal article supplement (PMC2988518)
Supplement: tjp0588-3551-SD1.pdf [file tjp0588-3551-SD1.pdf]

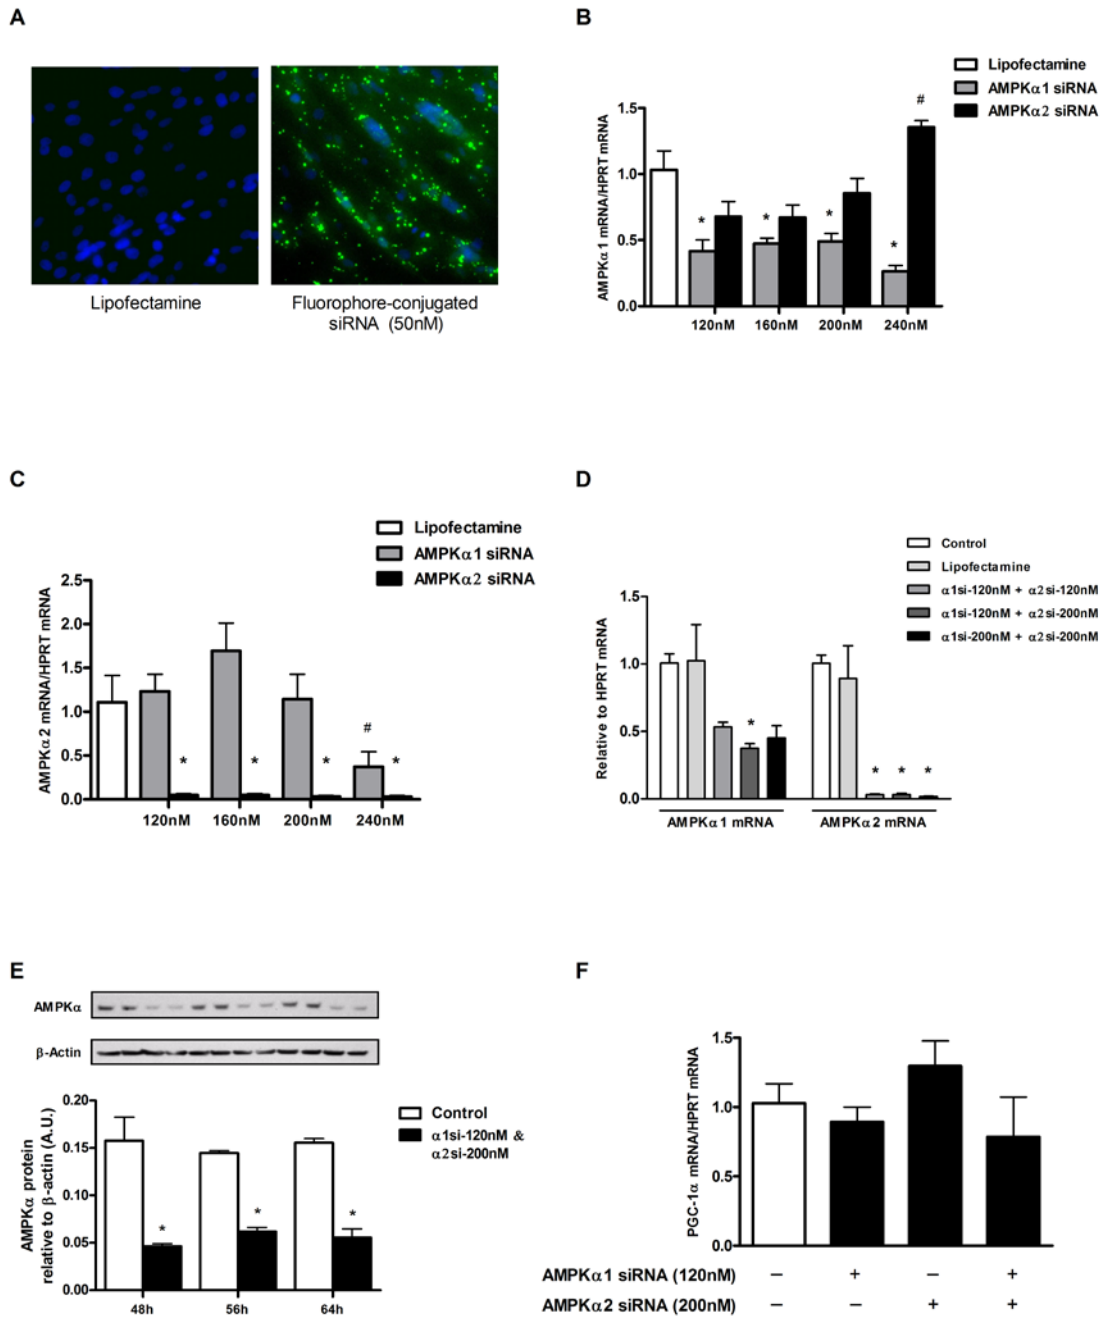

**Supplemental Figure 1. Titration of AMPKα1 siRNA and AMPKα2 siRNA based on AMPKα and PGC-1α expression in myotubes.** (A) Pictures of L6 myotubes treated with Lipofectamine (control vehicle) or transfected with fluorophore-conjugated siRNA (siGLO® green) for 24 hours (Merged pictures are shown, Blue - depicts nuclei stained with DAPI, Green - depicts siRNA, magnification =200x), (B) Effect of either AMPKα1 siRNA or AMPKα2 siRNA on AMPKα1 mRNA expression (n=4/group, \*P<0.05 in comparison to Control [open bar], #P<0.05 in comparison to other concentrations of AMPKα2 siRNA), (C) Effect of either AMPKα1 siRNA or AMPKα2 siRNA on AMPKα2 mRNA expression (n=3-

4/group, \*P<0.05 in comparison to Control [open bar], # P<0.05 in comparison to other concentrations of AMPK $\alpha$ 1 siRNA), (D) Effect of different concentrations of AMPK $\alpha$ 1 siRNA and AMPK $\alpha$ 2 siRNA used in combination on AMPK $\alpha$ 1 mRNA and AMPK $\alpha$ 2 mRNA expression (n=4/group, \*P<0.05 in comparison to Control and Lipofectamine), (E) Effect of AMPK $\alpha$ 1 siRNA and AMPK $\alpha$ 2 siRNA used in combination on AMPK $\alpha$  protein expression at different time points after transfection (n=3/group, \*P<0.05 in comparison to Control), (F) Effect of AMPK $\alpha$ 1 siRNA and AMPK $\alpha$ 2 siRNA used alone or in combination on PGC-1 $\alpha$  mRNA expression (n=3-4/group). Samples were harvested 48 hours after transfection in all experiments, except for A as described above.
